# Supplementary material for: Dynamic Evolution of Antimicrobial Peptides Underscores Trade-Offs Between Immunity and Ecological Fitness
Source: Front Immunol. 2019 Nov 8;10:2620. doi: 10.3389/fimmu.2019.02620 (PMC6857651; doi:10.3389/fimmu.2019.02620)
Supplement: Supplementary Data File 1 — Annotated life histories: Annotations of feeding ecology in larvae and adults of Diptera in this study. Used in Figure 1. Datasets used in this study: Datasets and their accesions and quality scores for diverse Diptera used in this study. Used in Figure 1. Primers used in this study: Primers used in qPCR analysis or Sanger sequencing. qPCR reactions were run with a 60°C annealing and extension phase. Used in Figure 2. qPCR data from alt. species: qPCR data from initial explorations using Drosophila pseudoobscura, Drosophila immigrans, and Drosophila testacea (1 Experiment). Remarked as “not shown” in manuscript. Dneo DptC primer comparison: Comparison of Dneo\Dpt induction as measured by primers from Hamilton et al. (2014) and universal Testacea group Dpt primers from this study. Revises interpretation of Hamilton et al. (2014) and (24). [file Data_Sheet_1.xlsx]

## Sheet: README
Tabs included in this data file:
Annotated life histories
	Annotations of feeding ecology in larvae and adults of Diptera in this study. Used in Figure 1.
Datasets used in this study
	Datasets and their accesions and quality scores for diverse Diptera used in this study. Used in Figure 1.
Primers used in this study
	Primers used in qPCR analysis or Sanger sequencing. qPCR reactions were run with a 60'C annealing and extension phase. Used in Figure 2.
qPCR data from alt. species
	qPCR data from initial explorations using D. pseudoobscura, D. immigrans, and D. testacea (1 experiment). Remarked as "not shown" in manuscript.
Dneo DptC primer comparison
	Comparison of Dneo\Dpt induction as measured by primers from Hamilton et al. (2014) and universal Testacea group Dpt primers from this study. Revises interpretation of Hamilton et al. (2014) and Hanson et al. (2016).

## Sheet: Annotated life histories
Family	Common name	Species	Adult feeding	Larval feeding	Larval environment	Notes
Culicidae	Mosquito	Aedes aegypti	Blood meal, nectar	Scavenger	Aquatic
	Mosquito	Anopheles gambiae	Blood meal, nectar	Scavenger	Aquatic
	Mosquito	Culex	Blood meal, nectar	Scavenger	Aquatic
Chaoboridae	Phantom midge	Monochlonyx cinctipes	Nectar?	Predatory	Aquatic
	Phantom midge	Chaoborus trivittatus	Nectar?	Predatory	Aquatic
Chironomidae	Harlequin fly	Chironomis riparius	Non-feeding	Predatory	Aquatic
Psychodidae	Drain fly	Clogmia albipunctata	Non-feeding	Scavenger	Aquatic
Tipulidae	Crane fly	Tipula oleracea	Non-feeding	Scavenger	Moist terrestrial environments
Trichoceridae	Winter crane fly	Trichoceridae sp.	Non-feeding	Scavenger	Moist terrestrial environments
Scatopsidae	Dung midge	Coboldia fuscipes	Non-feeding	Saprophagous, Coprophagous	Terrestrial	Cosmopolitan scavengers, also major pests in Asian mushroom cultivation, feeding on mycelium of soil fungi
Cecidomyiidae	Hessian fly	Mayetiola destructor	Non-feeding	Sap-feeding	Terrestrial	Major wheat pest, adults live only a few days, larvae reside on outside of plant under leaves and rasp at stalk
Stratiomyidae	Black soldier fly	Hermetia illucens	Nectar	Scavenger	Terrestrial	Manure or compost
Asilidae	Robber fly	Holcocephala fusca	Predatory	Predatory	Terrestrial	Feed on other insects/arhropods
Dolichopodidae	Long-legged fly	Condylostylus patibulatus	Predatory	Predatory	Terrestrial	Condylostylus Dpts cluster with Hermitia on a long branch
Phoridae	Scuttle fly	Megaselia abdita	Omnivorous	Scavenger, saprophagous	Terrestrial	Used in forensic entomology
Syrphidae	Hover fly	Eristalis dimidiata	Nectar, pollen	Scavenger, saprophagous	Aquatic	Larvae feed on small organisms in stagnant water - bugguide
Diopsidae	Stalk-eyed fly	Teleopsis dalmanii	Decaying vegetation	Decaying vegetation	Terrestrial	They eat pureed sweet corn in the lab, decaying vegetation in wild
	Stalk-eyed fly	Sphyracephala brevicornis	Scavenger	Saprophagous	Terrestrial	Found by river banks?
Sepsidae	Scavenger fly	Themira minor	Coprophagous	Coprophagous	Terrestrial	Eats feces
Tephritidae	True fruit fly	Eutreta diana	Nectar	buds	Terrestrial	Larvae form galls, feed internally on developing flowers
	True fruit fly	Tephritis californica	Nectar	buds	Terrestrial	Tephritis species inhabit the inflorescences of plants
	True fruit fly	Trupanea jonesii	Nectar	buds	Terrestrial	Larvae form galls, feed internally on developing flowers
	True fruit fly	Anastrepha suspensa	Fruit	Fruit	Terrestrial	Major agriculture pest in tropical Americas
	True fruit fly	Bactrocera oleae	Fruit	Fruit	Terrestrial	Olive fruit fly
	True fruit fly	Rhagoletis zephyria	Fruit	Fruit	Terrestrial	Snowberry fruit fly
	True fruit fly	Ceratitis capitata	Fruit	Fruit	Terrestrial	Mediterranean fruit fly, infest wide variety of fruits
Agromyzidae	Leaf miner	Liriomyza trifolii	Plant-feeding, short-lived	Leaf miner	Terrestrial	Larvae live in and feed on internal leaf tissue under cuticle
Glossinidae	Tse tse fly	Glossina morsitans	Blood meal	Ovoviviparous	Terrestrial
Sarcophagidae	Grey flesh fly	Sarcophaga bullata	Carrion	Carrion	Terrestrial
Calliphoridae	Blue bottle fly	Calliphora vicina	Carrion	Carrion	Terrestrial
Ephydridae	Brine fly	Ephydra gracilis	Bacteria and algae	Bacteria, diatoms, detritus	Aquatic	Salty water, attracted to algal blooms
Drosophilidae	Variegated fruit fly	Phortica variegata	Males drink tears, females attracted to fruit	Rotting fruit and other organic matter	Terrestrial	They can spread nematode diseases… so they must get infected by nematodes somehow
	Vinegar fly, Fruit fly	Scaptodrosophila lebanonensis	Wine cellars	Feed on proprionic food	Terrestrial	Can be reared on Banana-Opuntia medium
Drosophila species groups	Common fruit fly	Representative Drosophila sp.
Melanogaster group		D. melanogaster	Cosmopolitan	Cosmopolitan	Terrestrial	Human commensals
Obscura group		D. pseudoobscura	Cosmopolitan	Cosmopolitan	Terrestrial	Cosmopolitan
Willistoni group		D. willistoni	Cosmopolitan	Cosmopolitan	Terrestrial	Readily reared in the lab on D. melanogaster food
subgenus Dorsilopha		D. busckii	Cosmopolitan	Cosmopolitan	Terrestrial	Human commensals, found on compost
Hawaiian Drosophila		D. grimshawii	Cosmopolitan	Cosmopolitan	Terrestrial	Bark-feeding - https://www.jstor.org/stable/2096870
Virilis group		D. virilis	Cosmopolitan	Cosmopolitan	Terrestrial	Feeds on decaying tree bark and sap/slime flux - doi: 10.1534/genetics.107.074112
Repleta group		D. mojavensis	Cactus specialist	Cactus specialist	Terrestrial	"Drosophila mojavensis normally breeds in necrotic columnar cactus, but they also feed and breed in Opuntia fruit (prickly pear) which serves as a seasonal resource" - https://doi.org/10.1093/jhered/esy056
Immigrans group		D. immigrans	Cosmopolitan	Cosmopolitan	Terrestrial	Human commensals, found on compost
		D. albomicans	Cosmopolitan	Cosmopolitan	Terrestrial	Human commensals, found on compost
Quinaria group		D. guttifera, D. innubila	Mushroom specialist	Mushroom specialist	Terrestrial	Rotting mushrooms
Testacea group		D. testacea, D. neotestacea	Mushroom specialist	Mushroom specialist	Terrestrial	Rotting mushrooms

## Sheet: Datasets used in this study
N50 scaffold	N50 contig	Total sequence length	Assembly	WGS	BioSample	Taxonomy
242385	145453	98759061	GCA_001014335.1	JXOR00000000	SAMN03276535	Coboldia fuscipes
50131	12439	131486098	GCA_001014365.1	JXPA00000000	SAMN03277610	Drosophila miranda
20491	3909	348062779	GCA_001014515.1	JXPS00000000	SAMN03283231	Glossina morsitans
19964	15578	113095133	GCA_001014355.1	JXOY00000000	SAMN03277225	Drosophila busckii
16703	6905	155550413	GCA_001014415.1	JXPM00000000	SAMN03282482	Phortica variegata
13081	9372	256248749	GCA_001014945.1	JXOV00000000	SAMN03277118	Clogmia albipunctata
11309	2117	410872512	GCA_001014675.1	JXPQ00000000	SAMN03283202	Ephydra gracilis
10503	8579	334371070	GCA_001014625.1	JXPT00000000	SAMN03283234	Bactrocera oleae
9868	7097	154533842	GCA_001014505.1	JXPV00000000	SAMN03284762	Chironomus riparius
9710	7584	187416727	GCA_001014445.1	JXPJ00000000	SAMN03282438	Scaptodrosophila lebanonensis
9692	5103	146853489	GCA_001014435.1	JXPD00000000	SAMN03280977	Mayetiola destructor
8778	7241	149768605	GCA_001014995.1	JXOX00000000	SAMN03277213	Drosophila albomicans
6407	3304	441264227	GCA_001014845.1	JXPH00000000	SAMN03281030	Mochlonyx cinctipes
6406	2909	220394761	GCA_001014525.1	JXPR00000000	SAMN03283209	Anopheles gambiae
5217	1778	516230974	GCA_001015215.1	JXPE00000000	SAMN03280978	Holcocephala fusca
4679	1613	319935455	GCA_001014835.1	JXPF00000000	SAMN03280979	Lucilia sericata
4558	3270	412270594	GCA_001015175.1	JXPG00000000	SAMN03280980	Megaselia abdita
4251	989	744596036	GCA_001014885.1	JXPU00000000	SAMN03284760	Aedes aegypti
4087	2040	269281158	GCA_001014815.1	JXOU00000000	SAMN03277052	Chaoborus trivitattus
3571	2825	99885510	GCA_001014575.1	JXPZ00000000	SAMN03283205	Themira minor
3432	1212	890457210	GCA_001014895.1	JXPW00000000	SAMN03285036	Hermetia illucens
3390	600	541697276	GCA_001017535.1	JXPP00000000	SAMN03283201	Tipula oleracea
3159	2493	469483437	GCA_001017525.1	JXPO00000000	SAMN03283143	Teleopsis dalmanni
2517	1477	315521093	GCA_001015235.1	JXPL00000000	SAMN03282443	Sphyracephala brevicornis
2483	1781	399685866	GCA_001015075.1	JXOS00000000	SAMN03276937	Cirrula hians
2418	1086	459231066	GCA_001017275.1	JXOT00000000	SAMN03276989	Calliphora vicina
2265	405	315428702	GCA_001015145.1	JXPC00000000	SAMN03278632	Eristalis dimidiata
2239	1110	451941653	GCA_001014875.1	JXOW00000000	SAMN03277208	Condylostylus patibulatus
2219	1894	396224597	GCA_001017455.1	JXPI00000000	SAMN03282437	Sarcophaga bullata
2213	1816	69698627	GCA_001014935.1	JXHJ00000000	SAMN03274827	Liriomyza trifolii
1969	906	342257700	GCA_001017515.1	JXPN00000000	SAMN03282621	Tephritis californica
1715	1035	494580772	GCA_001047195.1	JXPX00000000	SAMN03285074	Sarcophagidae sp. BV-2014
1675	387	233053157	GCA_001015115.1	JXPB00000000	SAMN03278126	Eutreta diana
1520	1395	41711596	GCA_001014425.1	JXPK00000000	SAMN03282441	Trichoceridae sp. BV-2014
1424	865	97281263	GCA_001014665.1	JXQA00000000	SAMN03283206	Trupanea jonesi
57274	64545	213462749	GCA_000786525.1	CBTT010000001-CBTT010064342	SAMEA3158483	Chironomus tentans
29570363	3071820	167994222	GCA_004354385.1	SKCT01	SAMN11037163	Drosophila innubila
862345	781095	208907727	GCA_001932985.1	MNCL01000001-MNCL01014695	SAMN05772833	Proctacanthus coquilletti
Additional sequence data:
Total Gbases	Genbank accession	Taxonomy	Closest genome
16	SRX277361	Liriomyza trifolii	Liriomyza trifolii
4.5	SRX803009	Liriomyza trifolii	Liriomyza trifolii
3	DRX064600	Liriomyza chinensis	Liriomyza trifolii
2.5	SRX2822444	Chironomus riparius	Chironomus riparius
3.9	SRX826524	Eristalis dimidiata	Eristalis dimidiata
16.5	SRX826544	Tephritis californica	Tephritis californica
17.5	SRX826545	Tephritis californica	Tephritis californica
1.4	SRX3540183	Anastrepha suspensa	Bactrocera oleae
71.7	SRX3841269	Anastrepha suspensa	Bactrocera oleae
1	SRX1817314	Rhagoletis zephyria	Bactrocera oleae
2.7	SRX1781447	Ceratitis capitata	Bactrocera oleae
N/A	TSA: GDUH01000001-GDUH01030575	Drosophila neotestacea	Drosophila innubila

## Sheet: Primers used in this study
Name/Direction	Species	Gene	Primer sequence (5'->3')	Purpose	Reference
Rp49 F	D. melanogaster	RpL32	GCC GCT TCA AGG GAC AGT ATC TG	qPCR	Hanson et al. (2019)
Rp49 R		RpL32	AAA CGC GGT TCT GCA TGA G		Hanson et al. (2019)
DptA-HanF		Dpt	ATG CCC GAC GAC ATG ACC AT		Hanson et al. (2016)
DptA-HanR		Dpt	TTG TCG GTG GTC CAC ACC TT		Hanson et al. (2016)
Dmel DptB-F1		DptB	TTG GAC TGG CTT GTG CCT TCT C		This study
Dmel DptB-R		DptB	TGG GAG CAT ATG CCA GTG GTT C		This study
CG5791-70F		CG5791	CTGATCGGCGCTCATCCCAG		Hanson et al. (2016)
CG5791-187R		CG5791	GGGATGAGGAGAAGCTGCGG		Hanson et al. (2016)
RpL-11F	D. virilis	RpL11	GCAGCCCGTGTTTTCTAAGG	qPCR	Hanson et al. (2016)
RpL-11R		RpL11	TACTCGCGAACTTTCAAGCCAC		Hanson et al. (2016)
vDptC-203F		Dpt	AGCGGCAAGGATGTATGGGC		Hanson et al. (2016)
vDptC-336R		Dpt	CCCCATGAAGGCTCGCTGTT		Hanson et al. (2016)
Dvir DptB-F		DptB	ACA CAA TTG CTG GCC GAG AAC TA		This study
Dvir DptB-R1		DptB	GCC CTG ACG TGG ACT GCC		This study
Dvir GJ23146-F		CG5791-orthologue	ACG GCG TTT GTT TGA CTT GTC C		Hanson et al. (2016)
Dvir GJ23146-R		CG5791-orthologue	GCC GTT GTT GAA GCT GCG ATA C		Hanson et al. (2016)
Dinn RpL32-94F	D. innubila	RpL32	TGC CAA GTT GTC GCA CAA ATG G	qPCR	This study
Dinn RpL32-206R		RpL32	TGC GCT TGT TGG AAC CGT AAC		This study
Dinn DptC-50F		Dpt	TGG CCT ATC CCA GTC CTT ATC C		This study
Dinn DptC-132R		Dpt	GTC TCG GCC ACT CTT GTC G		This study
Dinn DptB-99F		DptB	TGA GCC GGA AAT ACA ATT GCT ACC		This study
Dinn DptB-194R		DptB	CCT CCC TGG ACT TTC CAT TGC		This study
Dinn Bom-49F		CG5791-orthologue	CTG CCA GTT TTG ATC AGC GCT		This study
Dinn Bom-143R		CG5791-orthologue	CCA TTT ATG TAA ACC GCT TCG CCA		This study
nRpL28-F	D. neotestacea, D. testacea	RpL28	TAC CTG GGT CAG ATC CTT GC	qPCR	Hamilton et al. (2014)
nRpL28-R		RpL28	CGT GCC GTT AAG AAC ACC AC		Hamilton et al. (2014)
Testacea DptC-338F		Dpt	GAT GGC CTA TCC CAA TCC TCC TC		This study
Testacea DptC-461R		Dpt	GTC CTT GCC ACT CTG GTC C		This study
Dros-174F		Drosocin	GCGAATTCATTCCAATCGATCGGTATC		Hanson et al. (2016)
Dros-281R		Drosocin	CTGACACGGCCATTGCGAAG		Hanson et al. (2016)
nBom-55F		CG5791-orthologue	GACCAGTTGCCGGCAGCTAA		Hanson et al. (2016)
nBom-181R		CG5791-orthologue	TGGGACAGGTCAGGCAAACG		Hanson et al. (2016)
Dpse RpL32 F	D. pseudoobscura	RpL32	TGC CAA GTT GTC GCA CAA ATG G	qPCR	Ben Longdon
Dpse RpL32 R		RpL32	TAC GCT TGT TGG AGC CGT AAC		Ben Longdon
Dpse DptA-153F		Dpt	CAA CTT TGG AGT GCG TGG CA		This study
Dpse DptA-266R		Dpt	TCC GAG TTG CCC CAC TGT C		This study
Dpse Bom-259F		Dpse\GA19132, CG5791-orthologue	GGA GGC GGC ACT GTC TAT CAT AG		This study
Dpse Bom-337R		Dpse\GA19132, CG5791-orthologue	GTT AAA CAT CCA CAT TGC AGT GTT CG		This study
Dimm RpL32 F	D. immigrans	RpL32	TGC TAA GTT GTC GCA CAA ATG G	qPCR	Duxbury et al. (2019)
Dimm RpL32 R		RpL32	TAC GCT TGT TGG AGC CAT AAC		Duxbury et al. (2019)
Dimm DptC-F		DptC	ATG AAG TTC ACA ATC CTT GCT CTG G		This study
Dimm DptC-139R		DptC	GGT CAT TGT TTT GCT GCG GC		This study
Test Mtk 663F	D. neotestacea, D. testacea	Mtk	CTA TAA AAG CGA ATT GGA TTT GGC G	PCR	This study
Test Mtk 900R		Mtk	GTT AAC GAC ATC AGA GTG TCA GC		This study
Test DptB 547F	D. testacea	DptB	TCG GGA AAT TCA ATT GCA GAT AAC TC		This study
Test DptB 989R		DptB	GTT TAC GTG GTT CCA AAG TGC TG		This study

## Sheet: qPCR data from alt. species
qPCR data from one experiment (pooled samples according to Materials and Methods) for Dpt and Bom using RpL28 (D. testacea) or RpL32 (D. pseudoobscura, D. immigrans) as a reference gene.
Gene/Unchallenged represents the times induction of the gene relative to the unchallenged condition for each treatment. Dpt = Diptericin, Dro = Drosocin, Bom = Bomanin CG5791.
Gene normalized to max represents the induction relative to the maximum observed induction amongst treatments, as is presented in Figure 2B. As each gene and each species varies considerably in basal expression (and therefore induction), expression was normalized to the maximum expression within each replicate to allow for clear comparisons.
D. testacea
Treatment	Dpt/Unchallenged	Dpt normalized to max	Bom/Unchallenged	Bom normalized to max	Dro/Unchallenged	Dro normalized to max
Unchallenged	1	0.0189072	1	0.327	1	0.0224065
M. luteus	52.89	1	3.0581	1	35.26	0.790052
C. albicans	50.0397	0.946108	1.79817	0.588	44.63	1
E. coli	30.7	0.58045	0.75841	0.248	14.12	0.316379
D. pseudoobscura
Treatment	Dpt/Unchallenged	Dpt normalized to max	Bom/Unchallenged	Bom normalized to max
Unchallenged	1	0.000362433	1	0.194791
M. luteus	36.3781	0.0131846	5.1337	1
C. albicans	8.72406	0.00316188	2.26577	0.441351
E. coli	2759.13	1	1.3566	0.264255
D. immigrans
Treatment	Dpt/Unchallenged	Dpt normalized to max
Unchallenged	1	0.0019
M. luteus	41.64	0.0791
C. albicans	56.1	0.1066
E. coli	526.39	1

## Sheet: Dneo DptC primer comparison
qPCR data from one experiment using the same cDNA for both primers from Hamilton et al. (2014) and this study
Gene/Unchallenged represents the times induction of the gene relative to the unchallenged condition for each treatment.
Gene normalized to max represents the induction relative to the maximum observed induction amongst treatments, as is presented in Figure 2B.
D. neotestacea
Treatment	Dpt/Unchallenged - Hamilton et al. (2014) primers	Hamilton et al. (2014) primers normalized to max	Dpt/Unchallenged - DptC 338F-461R	Testacea DptC 338F-461R normalized to max
Unchallenged	1	0.591716	1	0.00216713
M. luteus	1.69	1	461.44	1
C. albicans	1.38	0.816568	341.32	0.739684
E. coli	1.05	0.621302	353.36	0.765777
